# Supplementary material for: Comparative assessment of Alzheimer’s disease-related biomarkers in plasma and neuron-derived extracellular vesicles: a nested case-control study
Source: PubMed Central journal article supplement (PMC10565036; doi:10.3389/fmolb.2023.1254834), 2023-09-27
Supplement: DataSheet1.pdf [file DataSheet1.pdf]

## *Supplementary Material*

# **Comparative Assessment of Alzheimer's Disease-Related Biomarkers in Plasma and Neuron-Derived Extracellular Vesicles: a Nested Case-Control Study**

**Apostolos Manolopoulos<sup>1\*</sup>, Francheska Delgado-Peraza<sup>1</sup>, Maja Mustapic<sup>1</sup>, Krishna Ananthu Pucha<sup>1</sup>, Carlos Nogueras-Ortiz<sup>1</sup>, Alexander Daskalopoulos<sup>1</sup>, De'Larrian DeAnté Knight<sup>1</sup>, Jeannie-Marie Leoutsakos<sup>2,3</sup>, Esther S Oh<sup>3,4</sup>, Constantine G Lyketsos<sup>2,3</sup>, Dimitrios Kapogiannis<sup>1\*</sup>**

<sup>1</sup>Intramural Research Program, Laboratory of Clinical Investigation, National Institute on Aging, Baltimore, MD, USA.

<sup>2</sup>Department of Psychiatry and Behavioral Sciences, Johns Hopkins School of Medicine, Baltimore, MD, USA.

<sup>3</sup>Richman Family Precision Medicine Center of Excellence in Alzheimer's Disease, Johns Hopkins School of Medicine, Baltimore, MD, USA.

<sup>4</sup>Department of Medicine, Division of Geriatric Medicine and Gerontology, Johns Hopkins School of Medicine, Baltimore, MD, USA.

**\* Correspondence:**

Apostolos Manolopoulos, M.D., M.Sc.

[apostolos.manolopoulos@nih.gov](mailto:apostolos.manolopoulos@nih.gov)

Dimitrios Kapogiannis, M.D.

[kapogiannisd@mail.nih.gov](mailto:kapogiannisd@mail.nih.gov)

## Figure legends

**Figure S1.** Assessment of hemolysis using a previously described method (Harboe, 1959). Series of gradually hemolyzed standards were prepared by diluting a completely hemolyzed sample (100%) with non-hemolyzed plasma (0%). (A) Absorbance of Hemoglobin at 415 nm in standards; (B) Hemoglobin absorbance of standards and 20 plasma samples isolated using the methodology described in the manuscript; (C) Visual representation of results.

**Figure S2.** NDEV Characterization. Comparison of (A) NDEV Concentration (n/mL); (B) NDEV mean diameter (nm); (C) NDEV CD9 (pg/mL); (D) NDEV CD63 (pg/mL); (E) NDEV CD81 (pg/mL); (F) NDEV Cytochrome C (pg/mL); (G) NDEV Syntenin-1 (pg/mL); (H) NDEV Very Late Antigen-4 (VLA-4) (pg/mL) between diagnostic groups. 1 = Visit 1; 2 = Visit 2; ns = not significant.

**Figure S3.** NDEV Characterization. (A) Graphical representation of NDEV size distribution and concentration determined by nanoparticle tracking analysis (NTA); (B) Transmission electron microscopy (TEM) image (negative staining, scale 200 nm) of isolated particles fitting the profile of EVs; (C) NanoView® pan-tetraspanins fluorescent assay showing fluorescently labeled detection probes (CD9, CD63, CD81) on ExoView™ chip; (D) Graphical representation of EVs captured on a chip with five different probes (CD9, CD41, CD63, CD81, and MIgG). Absence of CD41 as a platelet marker reflects the purity of EV isolation. CD9, CD63, and CD81 are canonical markers and MIgG shows a level of nonspecific binding. MIgG = Mouse IgG.

**Figure S4.** NDEV Characterization. (A) Western blot, probing for the neuronal markers NeuN, GluR2, and ENO2, that shows neuronal enrichment in NDEVs, compared to Total EVs, and beads only; (B) Validation of the isolation method, using a Human ProcartaPlex™ Simplex™ assay, that shows enrichment of canonical EV markers in NDEVs and pan-tetraspanin-EVs, compared to Total EVs, neat plasma, and beads only. TEV = Total EVs; BO = beads only; NeuN = Neuronal nuclear protein; GluR2 = Glutamate ionotropic receptor AMPA type subunit 2; ENO2 = Enolase 2; panTET-EVs = pan-tetraspanin-EVs.

**Figure S5.** Determination of optimal particle per frame (PPF) range using 200 nm beads. (A) PPF in function of sample fold dilution; (B) PPF range showing a linear relationship with sample dilution; (C) Size distribution of beads at different concentrations/PPF; (D) Assessment of the effect of sample concentration (PPF) on particle size mode.

**Figure S6.** Validation of optimal particle per frame (PPF) range using crude total EVs isolated from human plasma. (A, C, E) PPF in function of sample fold dilution; (B, D, F) PPF range showing linear relationship with sample dilution in crude EVs from the plasma of three different subjects; (G) Mean size distribution of crude EVs from the plasma of one human subject analyzed at concentrations providing PPFs either within the optimal range resulting in a linear relationship with sample dilution (red line), or at lower PPFs (black line). EVs/mL values have been corrected for dilution factor; (H) Min-to-max particle size mode distribution of crude EVs from the plasma of three human subjects analyzed at PPFs under (low PPF), within (optimal PPF), or above (high PPF) the optimal range. Statistical analysis: two-way ANOVA.

**Figure S7.** Associations between NDEV and plasma markers within each diagnostic group. **(A)** NDEV  $A\beta_{42}$  ~ Plasma  $A\beta_{42}$ ; **(B)** NDEV  $A\beta_{40}$  ~ Plasma  $A\beta_{40}$ ; **(C)** NDEV  $A\beta_{42}/A\beta_{40}$  ~ Plasma  $A\beta_{42}/A\beta_{40}$ ; **(D)** NDEV Total Tau ~ Plasma Total Tau; **(E)** NDEV P181-Tau ~ Plasma P181-Tau.

**Figure S1**

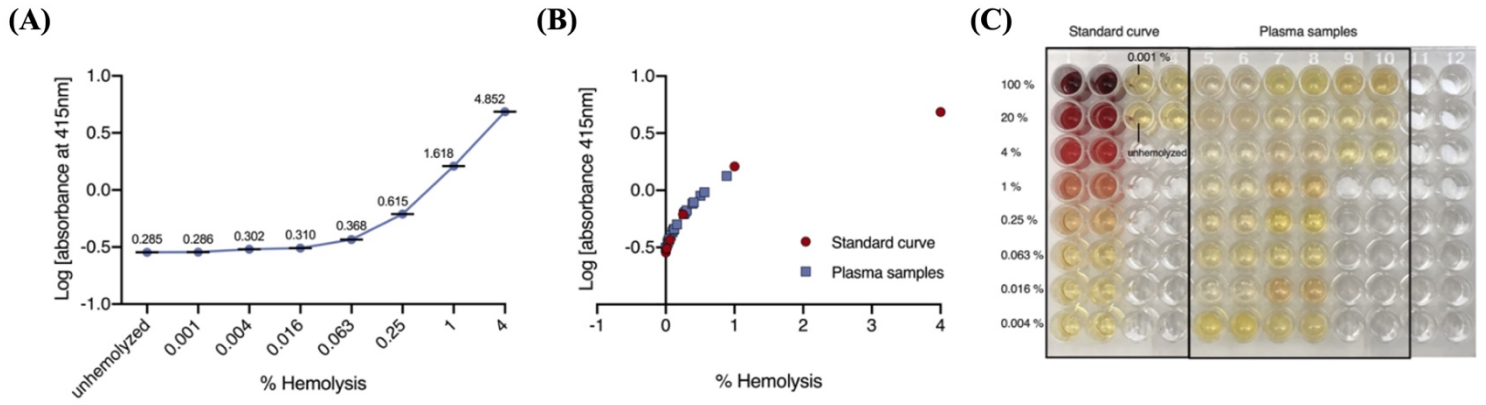

**Figure S2**

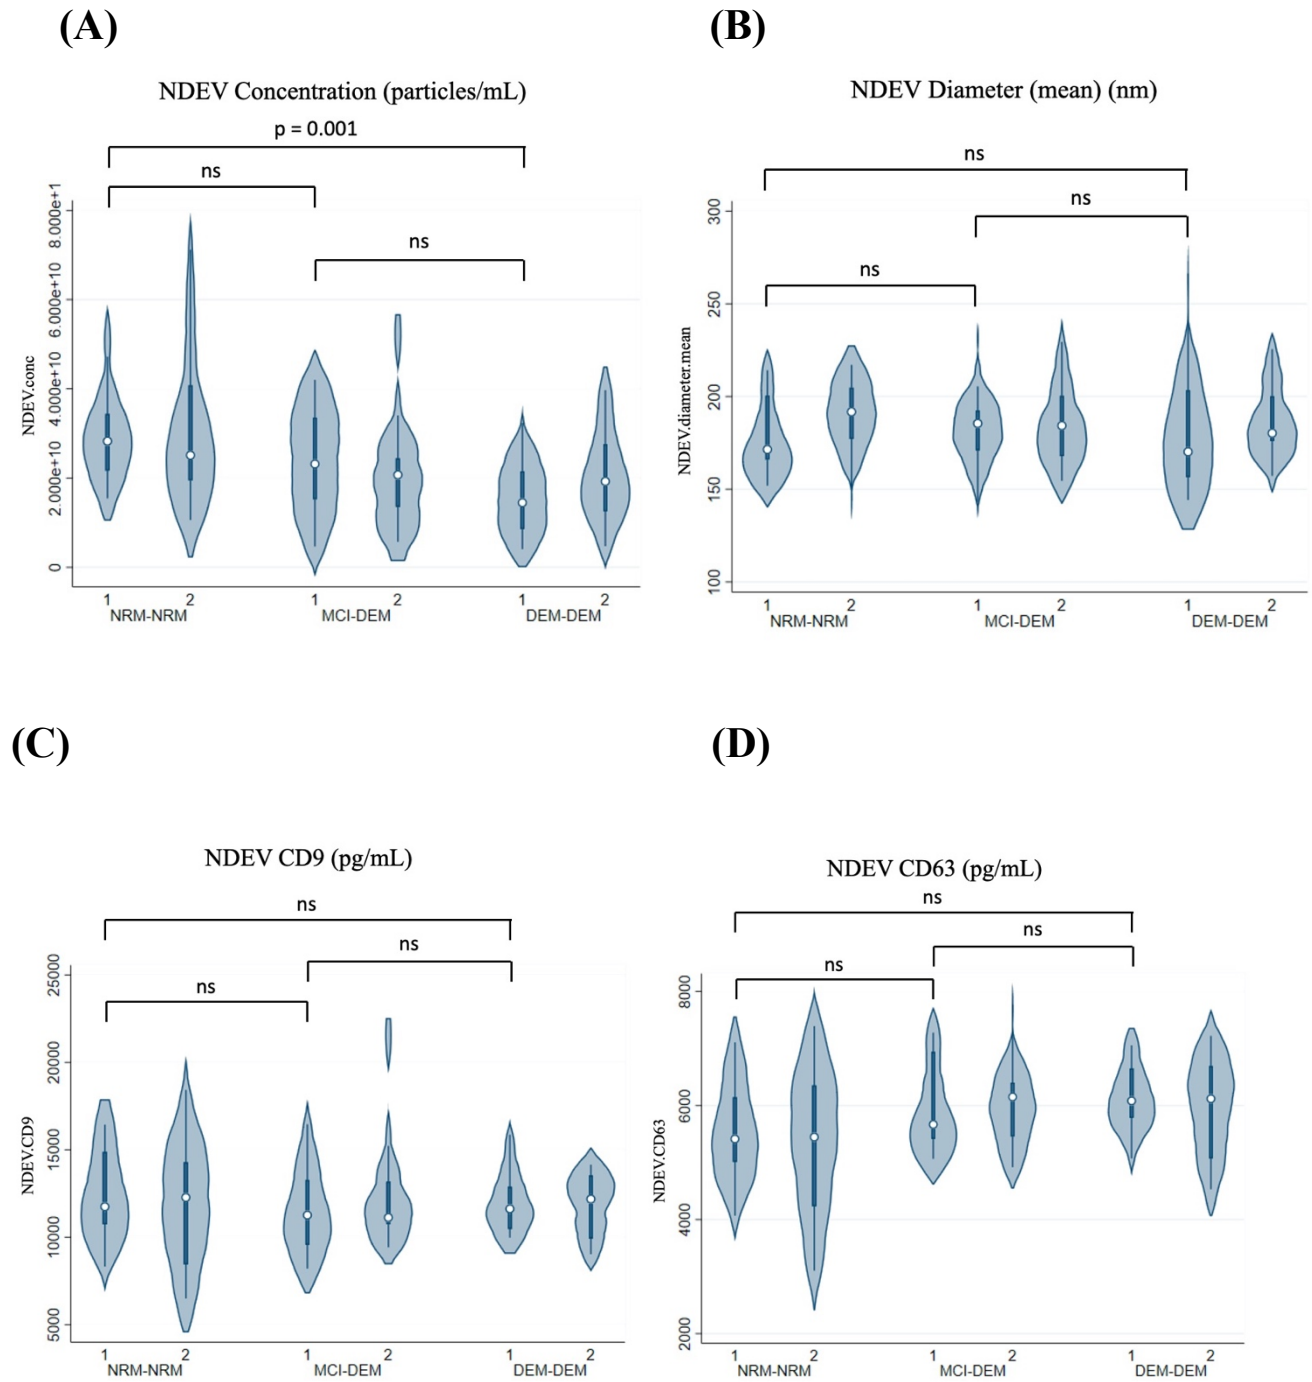

**(E)**

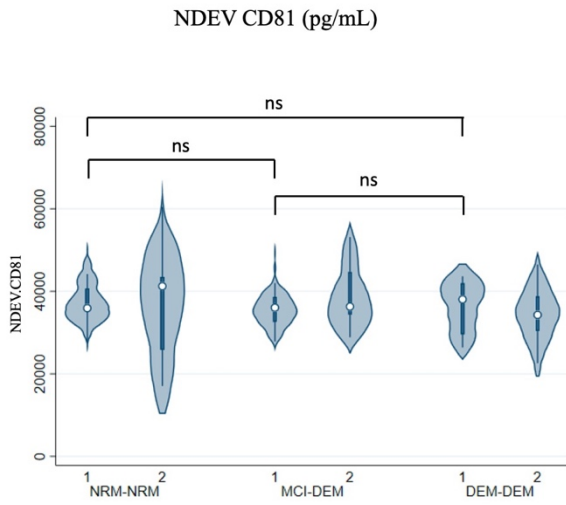

**(F)**

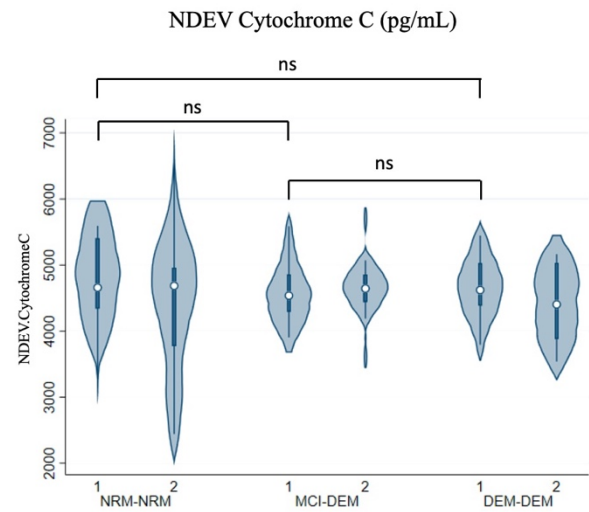

**(G)**

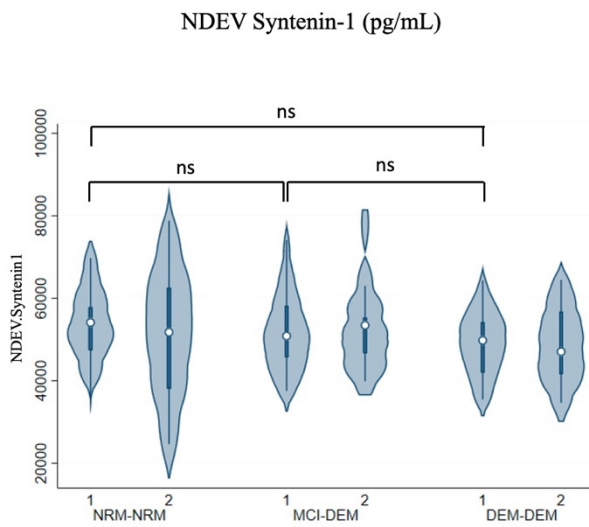

**(H)**

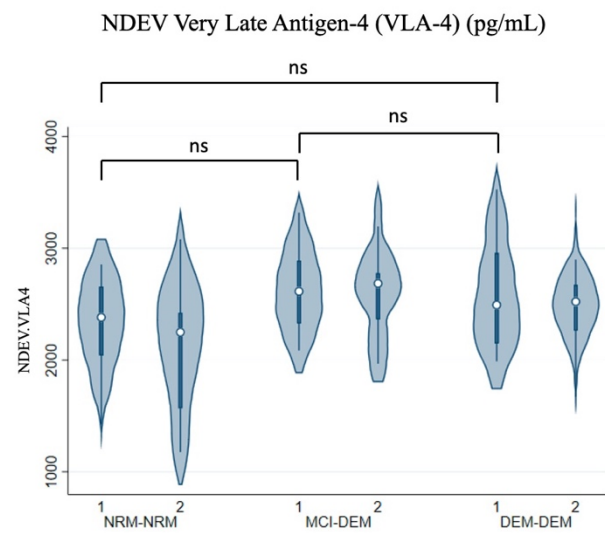

Figure S3

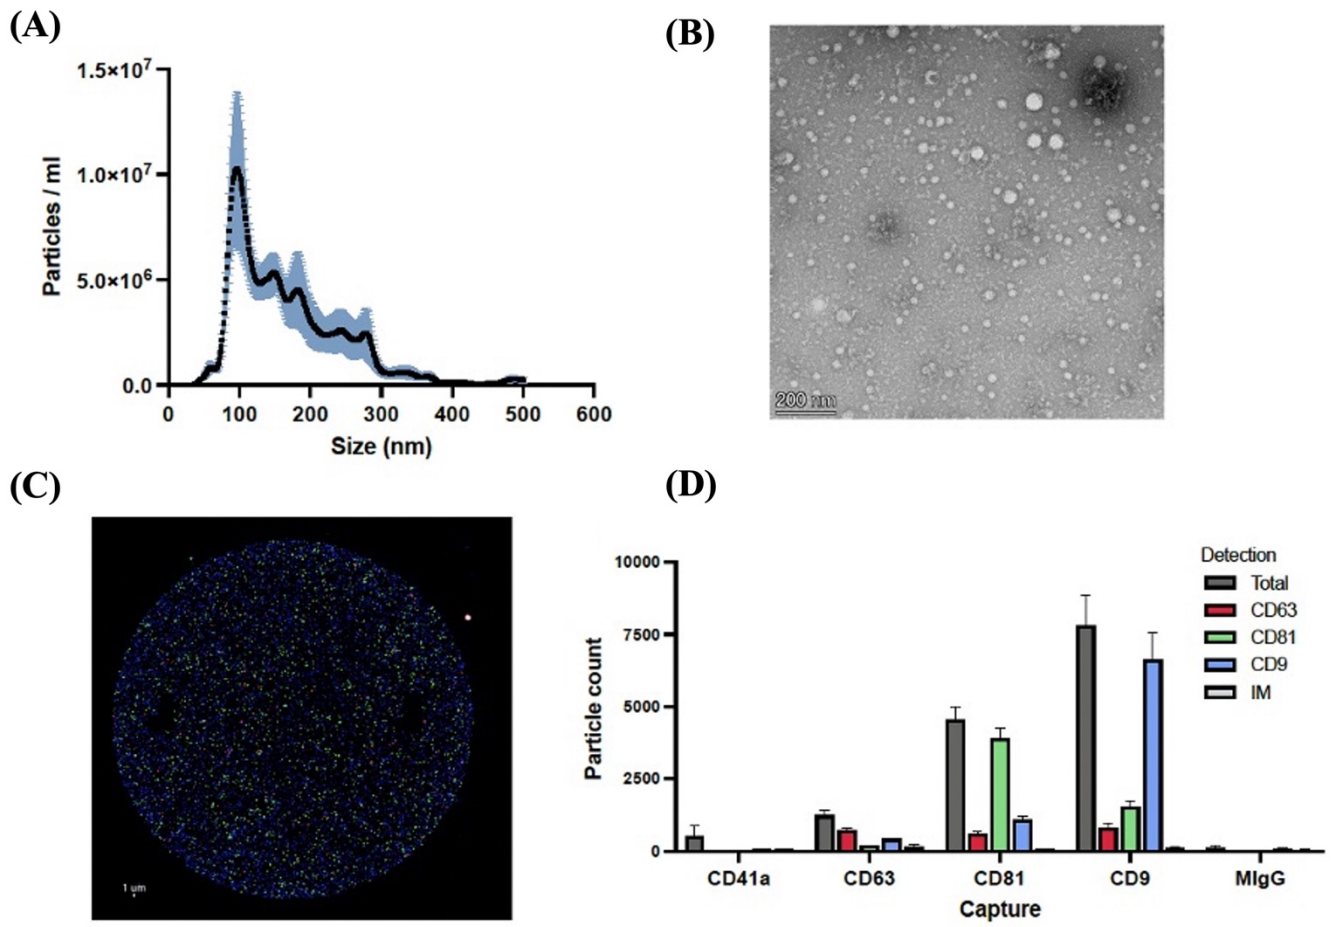

**Figure S4**

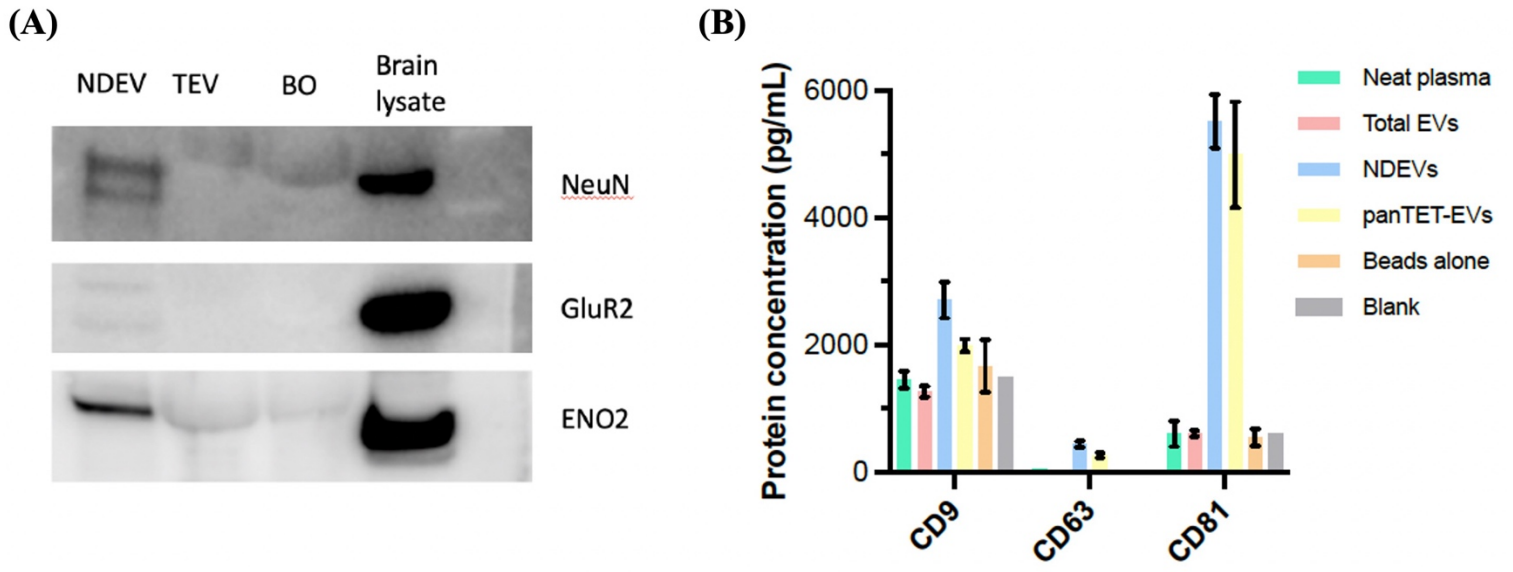



Figure S5

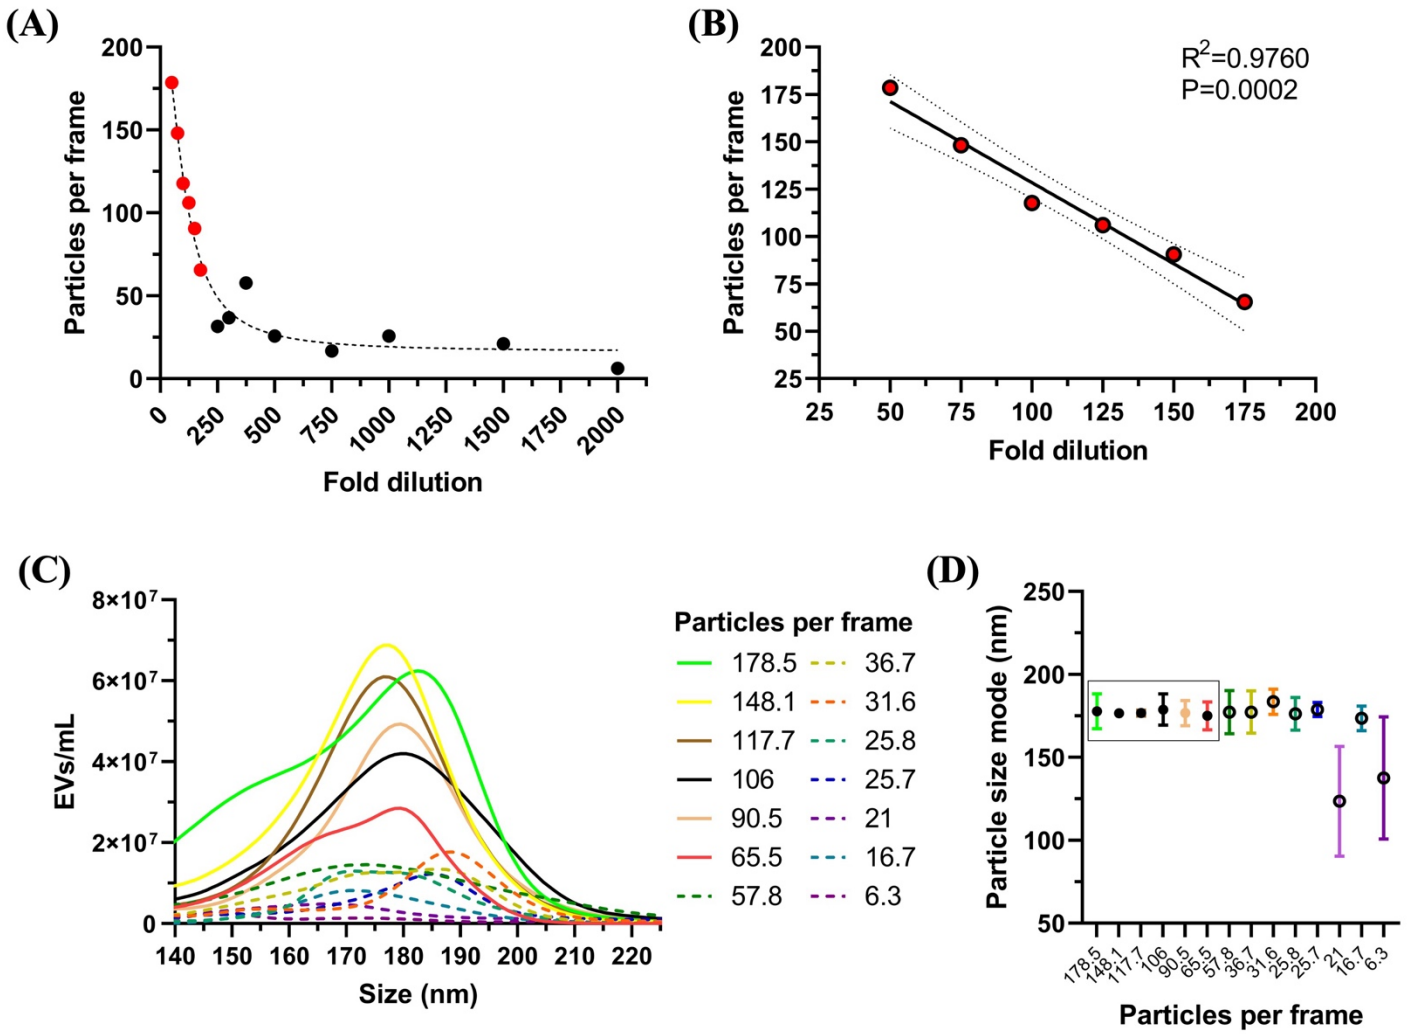

Figure S6

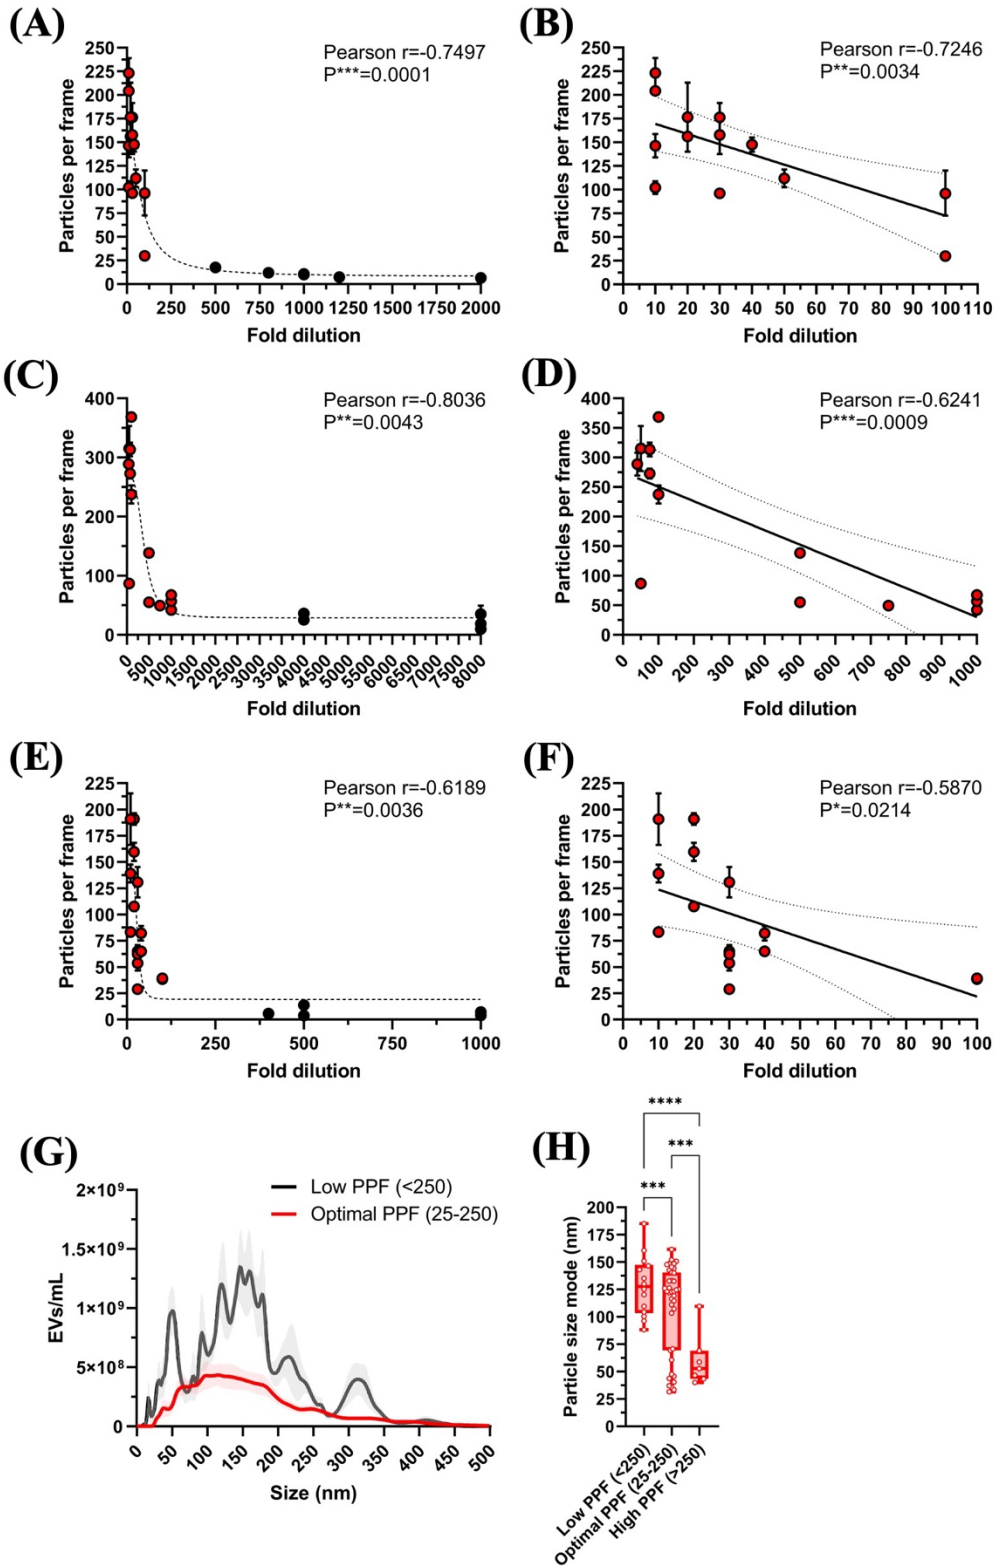

Figure S7

(A)

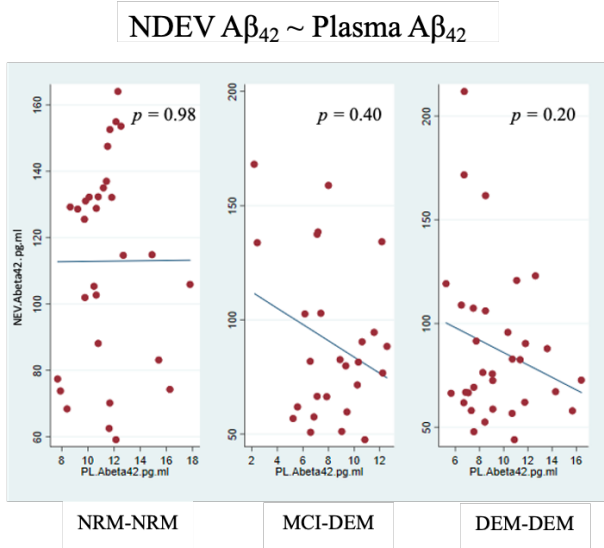

(B)

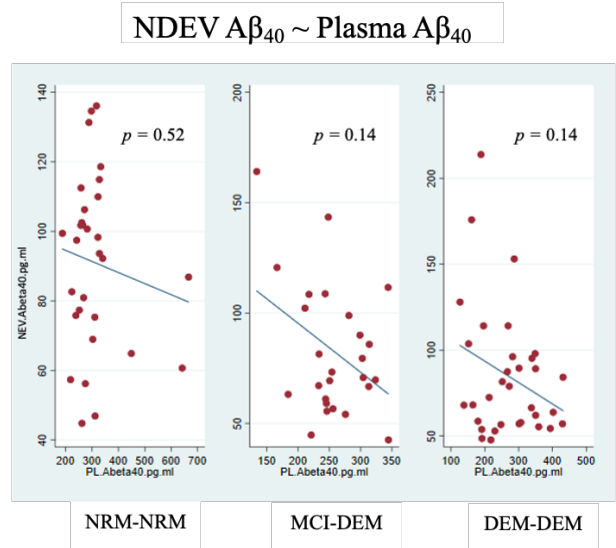

(C)

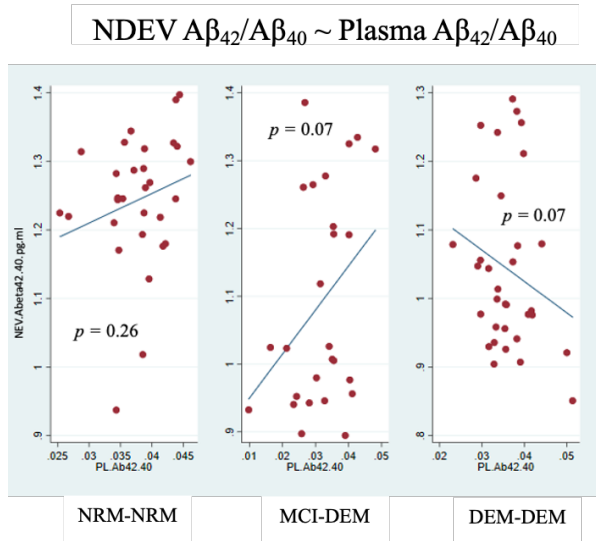

(D)

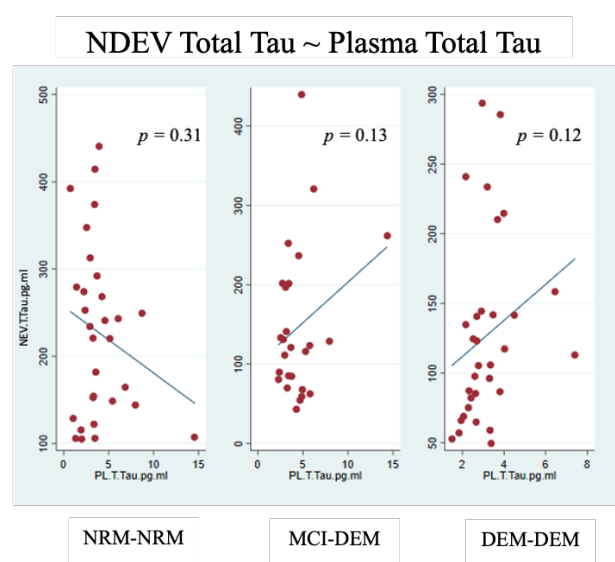

**(E)**

NDEV P181-Tau ~ Plasma P181-Tau

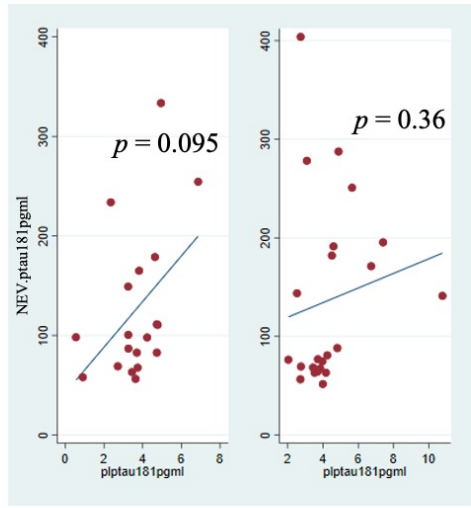

MCI-DEM

DEM-DEM

**Table S1.** Summary of non-Box-Cox transformed marker measurements

| Variable                                        | NRM-NRM                |                        |                         | MCI-DEM                |                        |                         | DEM-DEM                |                        |                         |
|-------------------------------------------------|------------------------|------------------------|-------------------------|------------------------|------------------------|-------------------------|------------------------|------------------------|-------------------------|
|                                                 | Visit 1                | Visit 2                | Change per year         | Visit 1                | Visit 2                | Change per year         | Visit 1                | Visit 2                | Change per year         |
| <b>NDEV MEASURES</b>                            |                        |                        |                         |                        |                        |                         |                        |                        |                         |
| <b>NDEV Concentration (particles/mL)</b>        | 2.99e+10<br>(1.09e+10) | 3.18e+10<br>(1.75e+10) | -4.27e+08<br>(7.41e+09) | 2.38e+10<br>(1.25e+10) | 2.06e+10<br>(1.27e+10) | -1.09e+09<br>(5.05e+09) | 1.57e+10<br>(7.94e+09) | 2.10e+10<br>(1.02e+10) | 2.96e+09<br>(6.43e+09)  |
| <b>NDEV Diameter (mean) (nm)</b>                | 178.114<br>(22.212)    | 189.107<br>(19.807)    | 4.662 (13.245)          | 183.285<br>(22.416)    | 186.6 (23.493)         | 3.474 (11.436)          | 181.212<br>(31.535)    | 187.294<br>(19.668)    | 1.55 (11.996)           |
| <b>NDEV Diameter (mode) (nm)</b>                | 132.386<br>(16.945)    | 139.171<br>(17.216)    | 1.987 (6.413)           | 138.546<br>(19.427)    | 156.062<br>(38.94)     | 12.112<br>(26.273)      | 139.659<br>(14.978)    | 153.125<br>(21.526)    | 8.046 (12.371)          |
| <b>CD9 (pg/mL)</b>                              | 12465.57<br>(2645.534) | 11994.06<br>(3600.272) | -24.955<br>(1419.676)   | 11657.32<br>(2598.353) | 12455.38<br>(3155.826) | 101.009<br>(1037.748)   | 12070.59<br>(1766.872) | 11723.46<br>(1879.586) | -203.449<br>(1603.734)  |
| <b>CD63 (pg/mL)</b>                             | 5554.842<br>(896.401)  | 5342.217<br>(1272.762) | -67.702<br>(487.993)    | 6013.343<br>(826.668)  | 6020.135<br>(746.776)  | -59.852<br>(566.58)     | 6105.306<br>(585.478)  | 5919.857<br>(900.846)  | -28.949<br>(686.254)    |
| <b>CD81 (pg/mL)</b>                             | 37681.74<br>(5914.339) | 36798.27<br>(12535.11) | -122.268<br>(5362.876)  | 36413.56<br>(5689.352) | 39014.64<br>(7334.546) | 141.455<br>(1729.388)   | 36138.07<br>(5894.765) | 34368.46<br>(6691.483) | -2164.725<br>(4919.348) |
| <b>Cytochrome C (pg/mL)</b>                     | 4746.052<br>(701.067)  | 4447.543<br>(1127.067) | -94.015<br>(472.751)    | 4594.068<br>(504.27)   | 4652.342<br>(503.709)  | 31.715<br>(335.729)     | 4636.875<br>(473.456)  | 4408.457<br>(562.705)  | -119.182<br>(370.45)    |
| <b>Syntenin-1 (pg/mL)</b>                       | 53713.27<br>(9425.329) | 51494.63<br>(15521.98) | -697.349<br>(7667.574)  | 52556.04<br>(10468.91) | 52857.9<br>(10503.76)  | -2224.182<br>(5581.718) | 49034.35<br>(7915.8)   | 48641.09<br>(8921.617) | -105.412<br>(6927.42)   |
| <b>VLA-4 (pg/mL)</b>                            | 2302.961<br>(419.884)  | 2137.981<br>(554.862)  | -61.997<br>(281.134)    | 2631.273<br>(372.165)  | 2615.838<br>(444.751)  | -30.668<br>(206.399)    | 2605.081<br>(469.995)  | 2494.399<br>(394.309)  | -100.488<br>(473.08)    |
| <b>A<math>\beta</math><sub>42</sub> (pg/mL)</b> | 115.14 (24.04)         | 106.882<br>(36.049)    | -2.81 (12.884)          | 83.785<br>(35.466)     | 96.39 (34.391)         | 9.947 (20.563)          | 92.37 (48.327)         | 82.743<br>(21.452)     | -10.324<br>(25.751)     |
| <b>A<math>\beta</math><sub>40</sub> (pg/mL)</b> | 93.082<br>(19.067)     | 85.745<br>(28.937)     | -2.351<br>(11.373)      | 77.005<br>(32.152)     | 88.225<br>(27.706)     | 8.512 (17.553)          | 89.132<br>(48.679)     | 80.55 (22.657)         | -9.282 (23.048)         |

|                                                                          |                        |                        |                       |                        |                        |                      |                        |                        |                        |
|--------------------------------------------------------------------------|------------------------|------------------------|-----------------------|------------------------|------------------------|----------------------|------------------------|------------------------|------------------------|
| <b>A<math>\beta</math><sub>42</sub>/A<math>\beta</math><sub>40</sub></b> | 1.24 (0.109)           | 1.249 (0.095)          | 0 (0.025)             | 1.093 (0.162)          | 1.089 (0.164)          | -0.001 (0.033)       | 1.046 (0.121)          | 1.04 (0.129)           | -0.009 (0.035)         |
| <b>Total Tau (pg/mL)</b>                                                 | 225.375<br>(87.804)    | 214.49<br>(106.756)    | -4.479<br>(35.067)    | 130.038<br>(71.973)    | 163.317<br>(112.991)   | 22.101 (48.5)        | 130.355<br>(80.301)    | 125.652<br>(49.509)    | -13.8 (47.553)         |
| <b>P181-Tau (pg/mL)</b>                                                  | 197.96 (71.32)         | 185.377<br>(86.95)     | -3.157<br>(41.587)    | 131.102<br>(81.723)    | 136.24<br>(67.513)     | 10.135<br>(35.276)   | 142.262 (99.6)         | 126.779<br>(66.554)    | -22.561<br>(67.808)    |
| <b>P231-Tau (pg/mL)</b>                                                  | 418.381<br>(94.283)    | 370.011<br>(84.994)    | -30.962<br>(72.481)   | 425.168<br>(122.893)   | 409.531 (70.9)         | -9.132 (44.16)       | 416.817<br>(87.512)    | 372.351<br>(89.316)    | -26.724 (53.67)        |
| <b>proBDNF (pg/mL)</b>                                                   | 14.585 (2.977)         | 13.109 (3.012)         | -0.491 (1.344)        | 9.74 (3.848)           | 10.551 (3.707)         | 0.57 (1.411)         | 9.794 (4.726)          | 9.079 (3.419)          | -0.946 (2.833)         |
| <b>BDNF (pg/mL)</b>                                                      | 30.431 (7.399)         | 32.499 (8.458)         | -0.454 (4.811)        | 27.074 (4.986)         | 30.274 (6.92)          | 0.988 (4.196)        | 29.908 (7.137)         | 32.245 (5.926)         | 0.342 (4.405)          |
| <b>NRGN (pg/mL)</b>                                                      | 340.812<br>(57.107)    | 324.625<br>(56.961)    | -11.685<br>(36.948)   | 325.524<br>(60.907)    | 337.053<br>(65.377)    | 8.357 (42.769)       | 329.76<br>(105.285)    | 307.912<br>(69.566)    | -27.901<br>(81.403)    |
| <b>a-syn (pg/mL)</b>                                                     | 278.339<br>(26.174)    | 275.43<br>(22.944)     | -4.198<br>(10.528)    | 290.245<br>(26.81)     | 299.713<br>(31.919)    | 7.167 (20.372)       | 293.999<br>(44.035)    | 290.385<br>(38.201)    | -7.383 (30.707)        |
| <b>NfH (pg/mL)</b>                                                       | 572.806<br>(94.516)    | 569.034<br>(114.444)   | -12.128<br>(63.076)   | 603.563<br>(81.551)    | 631.731<br>(93.863)    | 11.432<br>(56.364)   | 608.234<br>(151.032)   | 596.099<br>(104.932)   | -20.6 (107.158)        |
| <b>TDP-43 (pg/mL)</b>                                                    | 6747.372<br>(1552.984) | 6497.803<br>(1743.796) | -272.345<br>(961.764) | 7179.178<br>(1570.361) | 7046.781<br>(1681.157) | -143.692<br>(706.17) | 6995.157<br>(1481.272) | 6625.506<br>(1453.816) | -298.063<br>(1080.933) |
| <b>PLASMA MEASURES</b>                                                   |                        |                        |                       |                        |                        |                      |                        |                        |                        |
| <b>A<math>\beta</math><sub>42</sub> (pg/mL)</b>                          | 10.912 (2.422)         | 11.542 (2.24)          | 0.162 (0.763)         | 8.09 (2.85)            | 8.339 (2.753)          | 0.076 (1.094)        | 9.766 (2.759)          | 9.079 (2.995)          | -0.137 (0.891)         |
| <b>A<math>\beta</math><sub>40</sub> (pg/mL)</b>                          | 300.52<br>(109.713)    | 319.452<br>(111.106)   | 5.325 (27.276)        | 250.96<br>(54.722)     | 263.517<br>(51.434)    | 2.058 (40.299)       | 274.16<br>(72.264)     | 263.51<br>(101.981)    | -1.301 (45.167)        |
| <b>A<math>\beta</math><sub>42</sub>/A<math>\beta</math><sub>40</sub></b> | 0.037 (0.005)          | 0.037 (0.005)          | 0 (0.002)             | 0.032 (0.008)          | 0.032 (0.01)           | 0.001 (0.003)        | 0.036 (0.006)          | 0.036 (0.006)          | 0 (0.003)              |
| <b>Total Tau (pg/mL)</b>                                                 | 3.975 (2.366)          | 3.993 (3.332)          | 0.11 (1.275)          | 4.682 (3.089)          | 4.283 (1.645)          | -0.161 (1.147)       | 3.019 (0.773)          | 3.304 (1.611)          | -0.018 (0.59)          |
| <b>P181-Tau (pg/mL)</b>                                                  | 3.475 (1.153)          | 0.025                  |                       | 3.432 (1.528)          | 3.911 (1.375)          | -0.116 (0.505)       | 4.468 (2.284)          | 4.168 (1.351)          | 0.19 (0.476)           |

Values presented are mean (standard error).

## Reference

HARBOE, M. 1959. A method for determination of hemoglobin in plasma by near-ultraviolet spectrophotometry. *Scand J Clin Lab Invest*, 11, 66-70.
